# Supplementary material for: Photocatalytic chemistry of methanol on rutile TiO2(011)-(2 × 1)
Source: Royal Society of Chemistry journal article supplement (doi:10.1039/c6cp00556j), 2016-01-01
Supplement: c6cp00556j1.pdf [file c6cp00556j1.pdf]

**Supplementary Information for**  
**Photocatalytic Chemistry of Methanol on Rutile TiO<sub>2</sub>(011)-(2×1)**

Zhiqiang Wang,<sup>1, a)</sup> Qunqing Hao,<sup>1, a)</sup> Xinchun Mao,<sup>2</sup> Chuanyao Zhou,<sup>1, \*)</sup> Dongxu

Dai,<sup>1</sup> Xueming Yang<sup>1, \*)</sup>

1. State Key Laboratory of Molecular Reaction Dynamics, Dalian Institute of Chemical Physics, Chinese Academy of Science, 457 Zhongshan Road, Dalian, 116023, Liaoning, P. R. China
2. Center of Interface Dynamics for Sustainability, Institute of Materials, China Academy of Engineering Physics, Chengdu, 610200, Sichuan, P. R. China

<sup>a)</sup> These authors contributed equally to this work.

<sup>\*)</sup> To whom all correspondence should be addressed:

[chuanyaozhou@dicp.ac.cn](mailto:chuanyaozhou@dicp.ac.cn), [xmyang@dicp.ac.cn](mailto:xmyang@dicp.ac.cn)

Tel: +86-411-84695174

Fax: +86-411-84675584

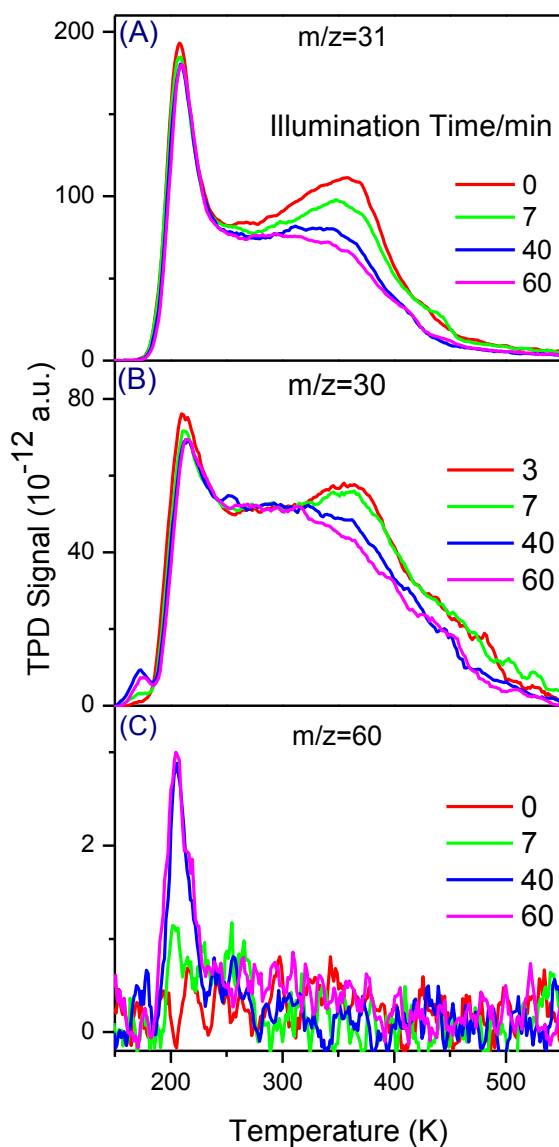

**Figure S1.** TPD spectrum for (A)  $m/z = 31$ , (B)  $m/z = 30$  and (C)  $m/z = 60$  as a function of light illumination (400 nm, flux  $2.24 \times 10^{18}$  photons  $\cdot$  cm $^{-2}$   $\cdot$  s $^{-1}$ ) after 0.67 ML methanol was dosed onto the TiO $_2$ (011)-(2 $\times$ 1) surface at 120 K. Data modified from Ref.1 (2015 Copyright American Chemical Society).

## References:

1. Mao, X.; Wang, Z.; Lang, X.; Hao, Q.; Wen, B.; Dai, D.; Zhou, C.; Liu, L.-M.; Yang, X., Effect of Surface Structure on the Photoreactivity of TiO<sub>2</sub>. *J. Phys. Chem. C* **2015**, *119*, 6121-6127.
